# Supplementary material for: Identification of a unique TGF-β–dependent molecular and functional signature in microglia
Source: Springer Nature journal article supplement (doi:10.1038/nn.3599), 2013-12-08
Supplement: 41593_2014_BFnn3599_MOESM68_ESM.pdf [file 41593_2014_BFnn3599_MOESM68_ESM.pdf]

**SUPPLEMENTAL MATERIAL**

**Identification of a Unique TGF- $\beta$  Dependent Molecular and Functional Signature in Microglia**

**Oleg Butovsky<sup>1\*</sup>, Mark P. Jedrychowski<sup>2</sup>, Craig S. Moore<sup>3</sup>, Ron Cialic<sup>1</sup>, Amanda J. Lanser<sup>1</sup>, Galina Gabriely<sup>1</sup>, Thomas Koeglsperger<sup>1</sup>, Ben Dake<sup>1</sup>, Pauline M. Wu<sup>1</sup>, Camille E. Doykan<sup>1</sup>, Zain Fanek<sup>1</sup>, LiPing Liu<sup>5</sup>, Zhuoxun Chen<sup>4</sup>, Jeffrey D. Rothstein<sup>4</sup>, Richard M. Ransohoff<sup>5</sup>, Steven P. Gygi<sup>2</sup>, Jack P. Antel<sup>3</sup> and Howard L. Weiner<sup>1\*</sup>**

<sup>1</sup>Center for Neurologic Diseases, Department of Neurology, Brigham and Women's Hospital, Harvard Medical School, Boston, MA 02112.

<sup>2</sup>Department of Cell Biology, Harvard Medical School, Boston, MA 02115, USA.

<sup>3</sup>Neuroimmunology Unit, Montréal Neurological Institute, McGill University, Montréal, Québec, Canada.

<sup>4</sup>Brain Science Institute and Department of Neurology, Johns Hopkins University, Baltimore, Maryland, USA.

<sup>5</sup>Department of Immunology, Cleveland Clinic, Cleveland, Ohio, USA.

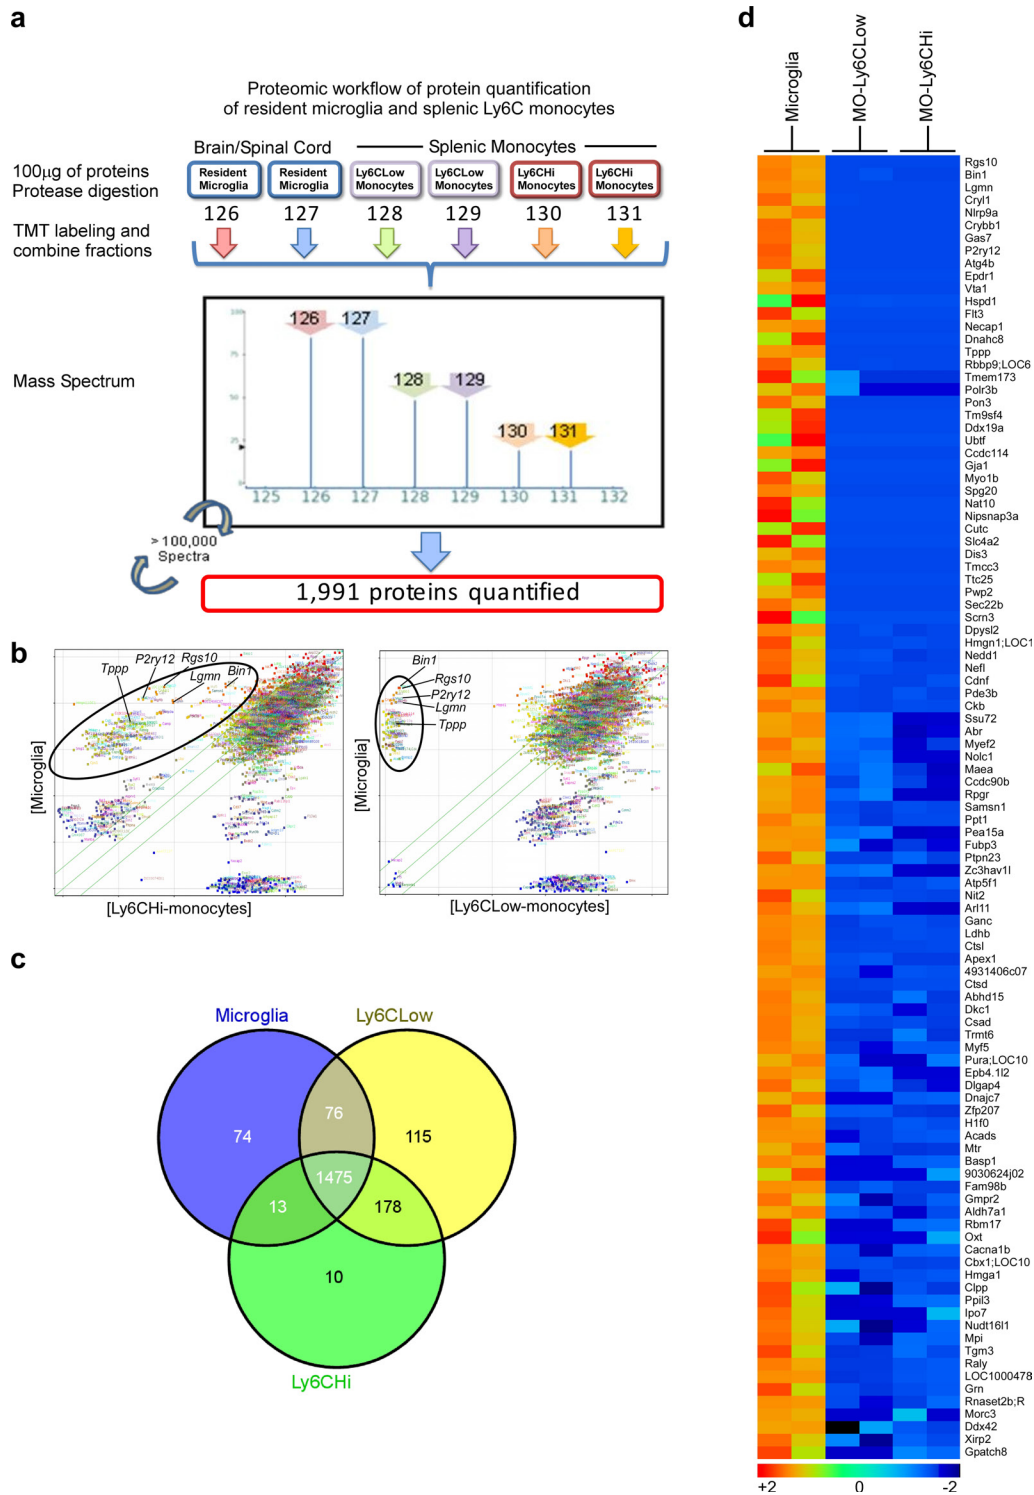

**Supplementary Figure 1. Identification of protein signature in microglia and Ly6C monocyte subsets.** (a) Schematic representation of the workflow for TMT-based quantitative proteomic analysis of microglia and splenic Ly6C monocytes. (b) Protein expression scatter plot of microglia versus monocytes subsets. (c) Venn diagram of unique and common proteins in microglia vs. Ly6C<sup>Hi</sup> and Ly6C<sup>Low</sup> monocytes. (d) Heatmap of 103 enriched microglia proteins (>5-fold).

## Top microglia functions

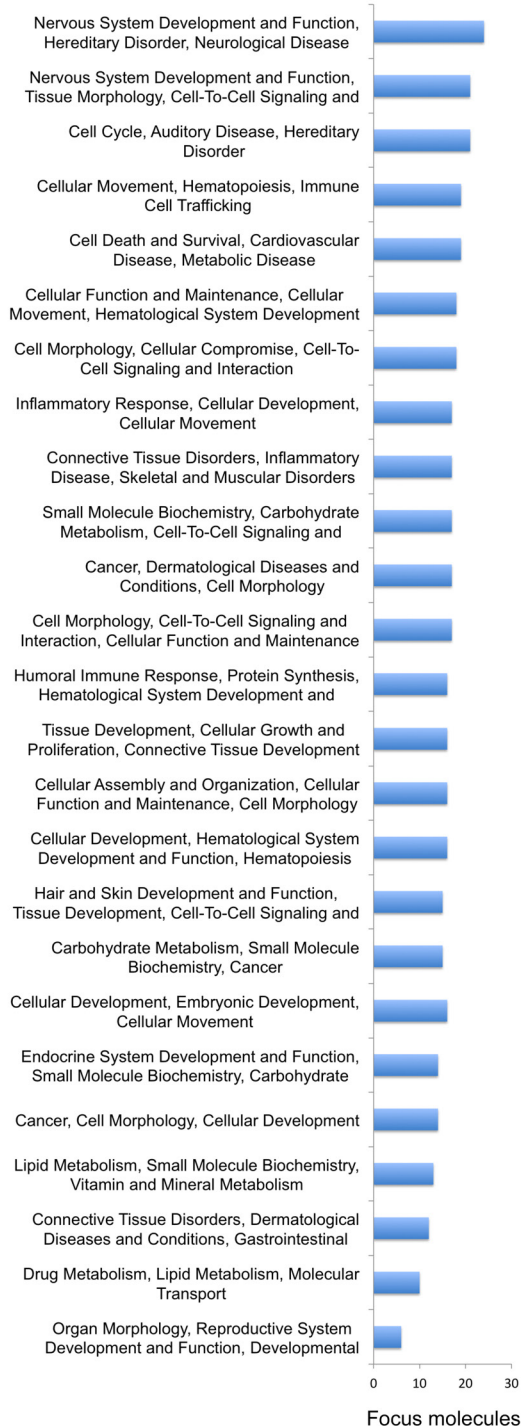

## Top monocyte functions

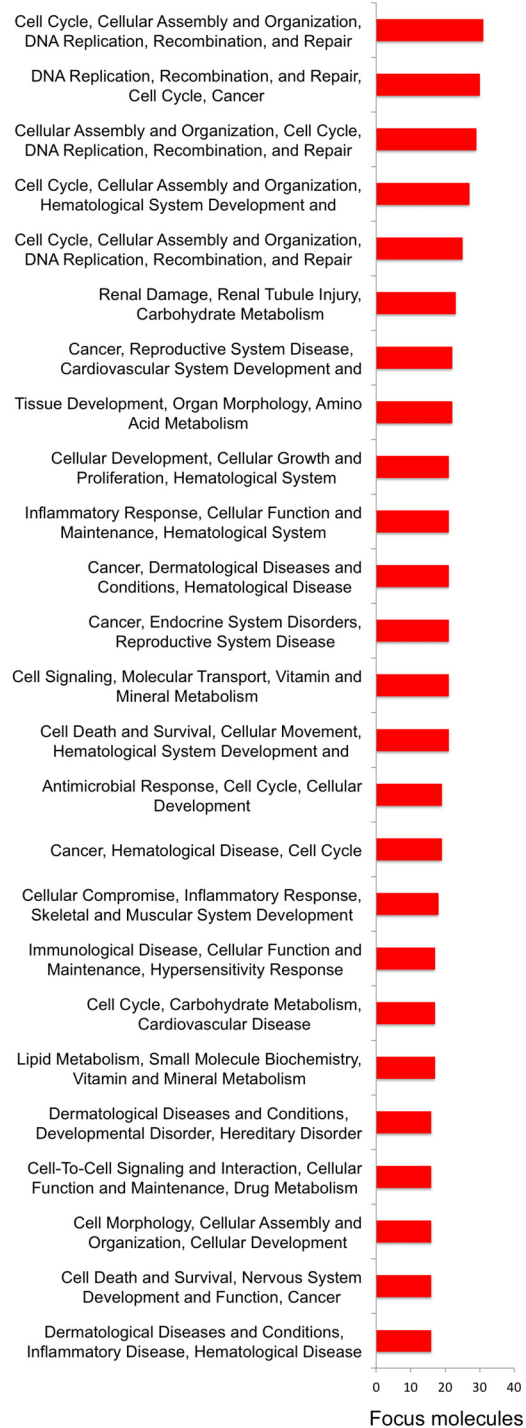

**Supplementary Figure 2. Top biological functions in microglia.** Microglia and monocyte gene signature identified by AffyExon1 arrays (see Fig. 1a) were analyzed by Ingenuity pathway analysis (IPA™). Bars indicate molecules present in dataset for each function.

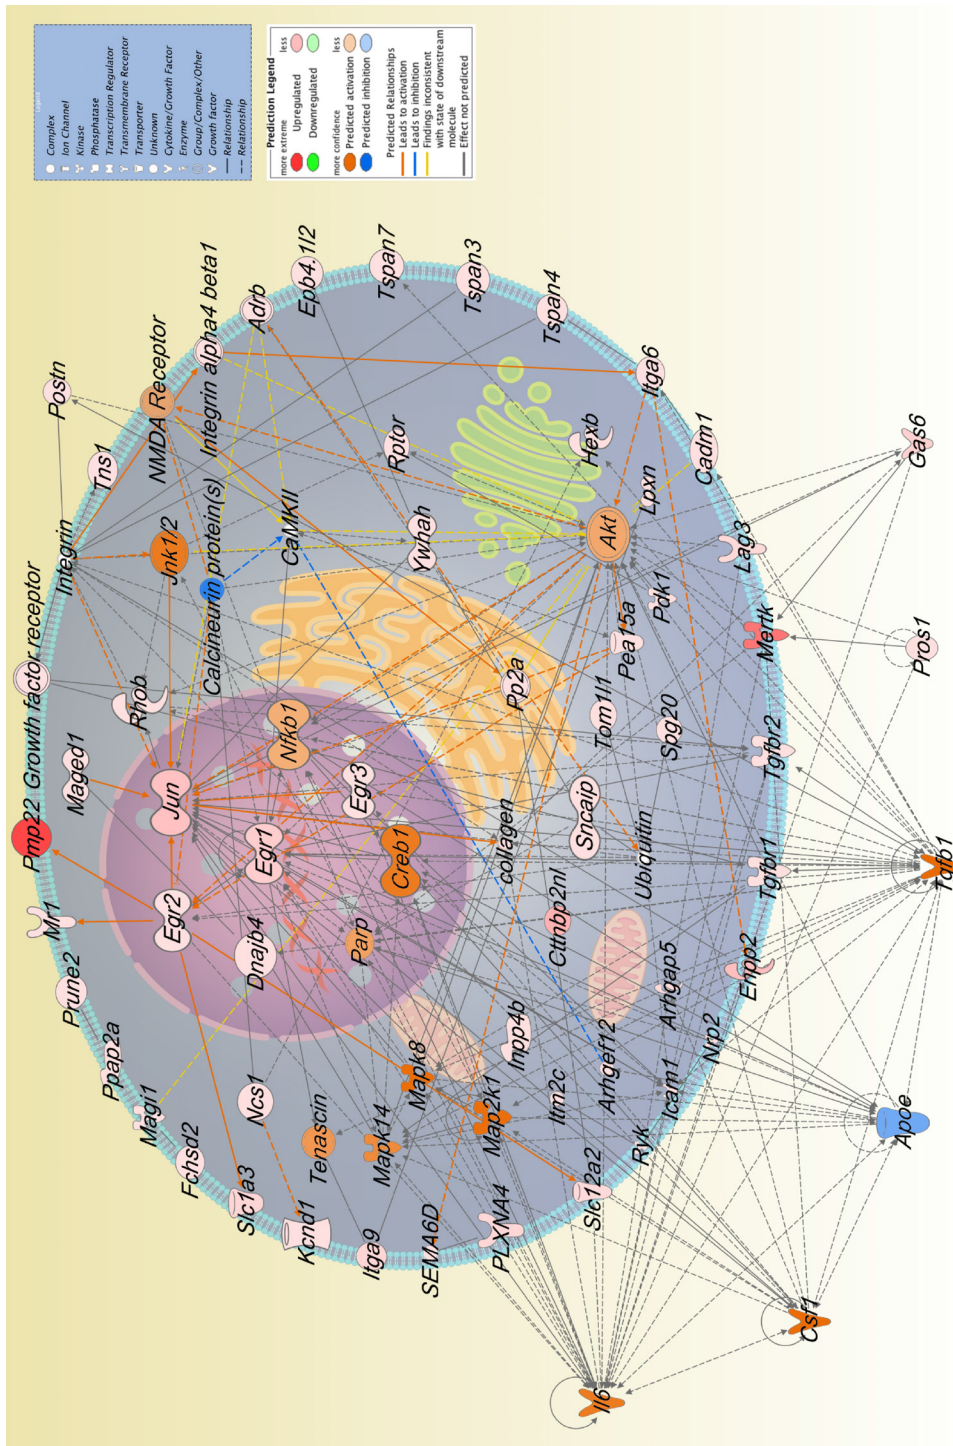

**Supplementary Figure 3. Nervous system development and function in microglia.** The subcellular localization of top microglial functions genes from Supplementary Figure 2 (Nervous system development and function, hereditary disorders, neurological disease genes) are illustrated. For each molecule in the dataset the expression fold change as compared to monocytes, P value and normalized expression level are presented.



# Microglial PU.1 network

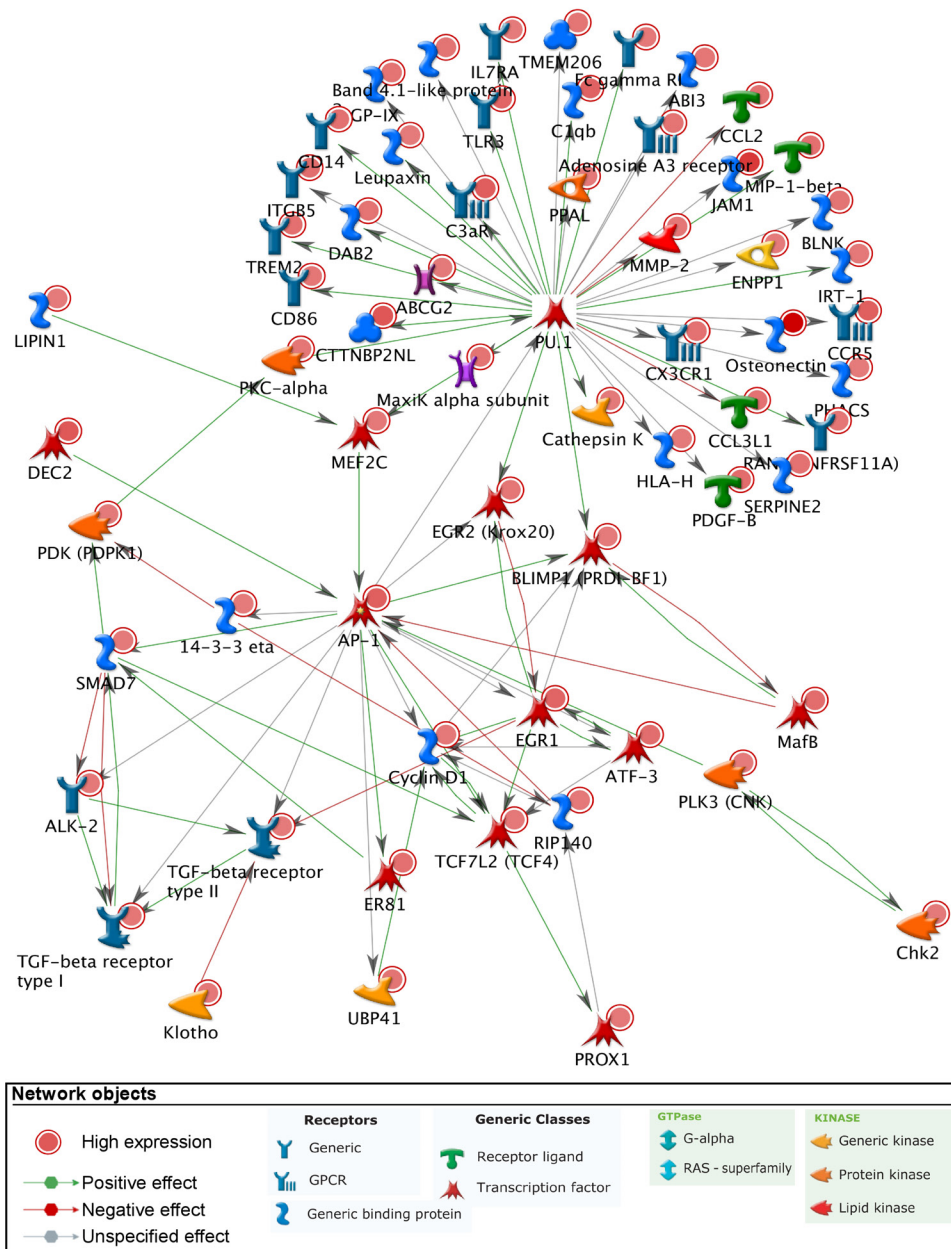

**Supplementary Figure 4. Top microglial interactions by protein function.** Illustration of microglial PU.1 network.

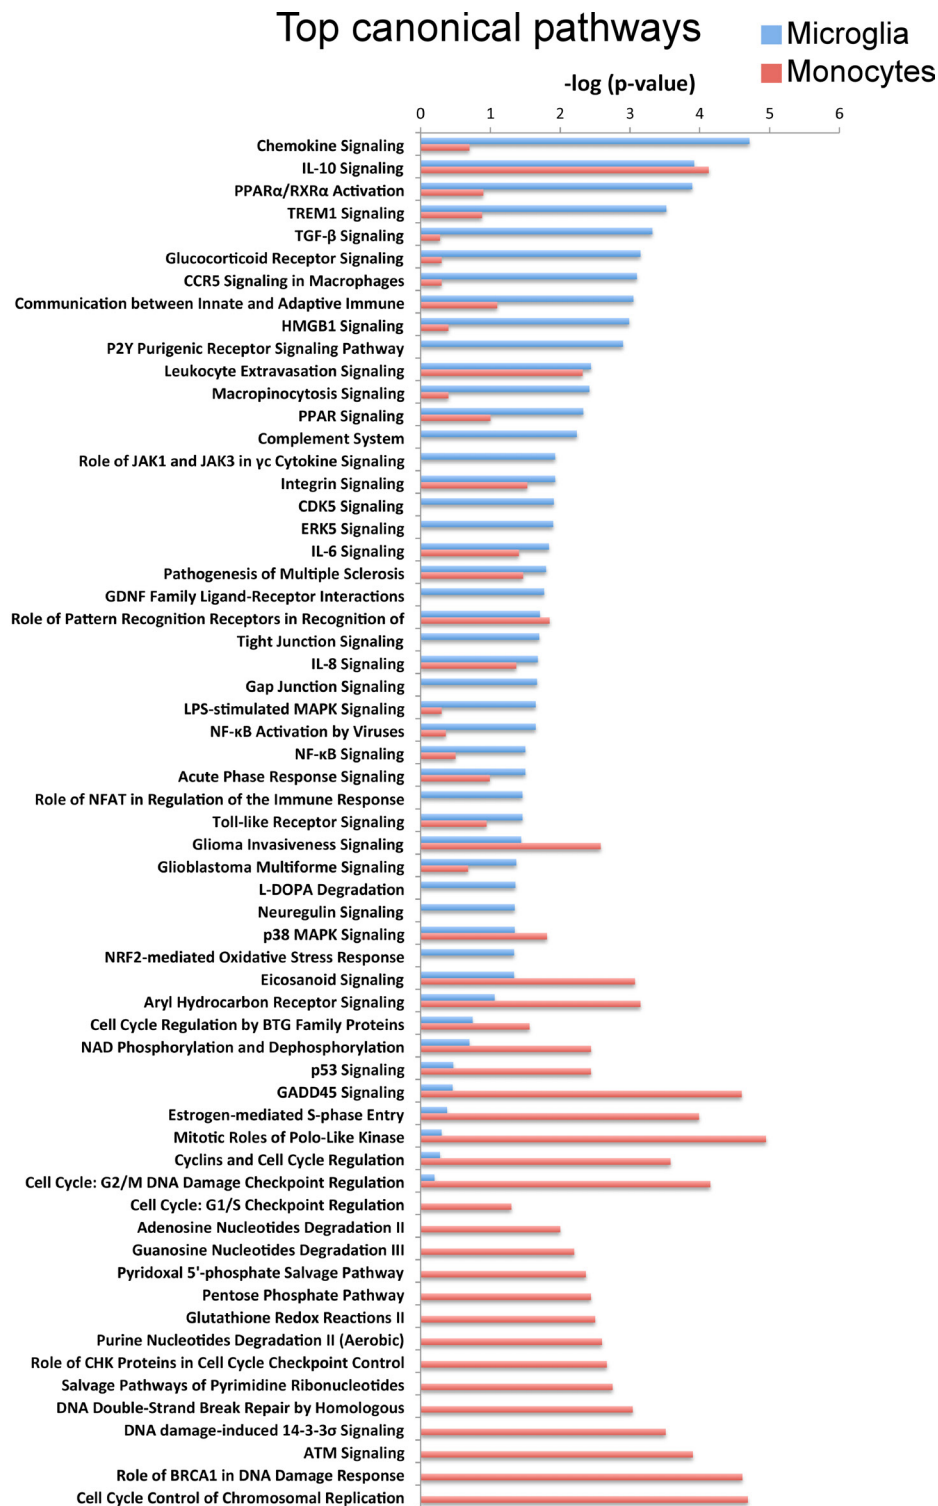

**Supplementary Figure 5. Canonical pathways in microglia and monocytes.** Microglial and monocytes gene signatures identified with AffyExon1 arrays were analyzed by IPA™ for canonical pathways. Bars indicate  $-\log P$  value (ratio of molecules present in the dataset out of all the function related molecules).

## TGFβ pathway in microglia

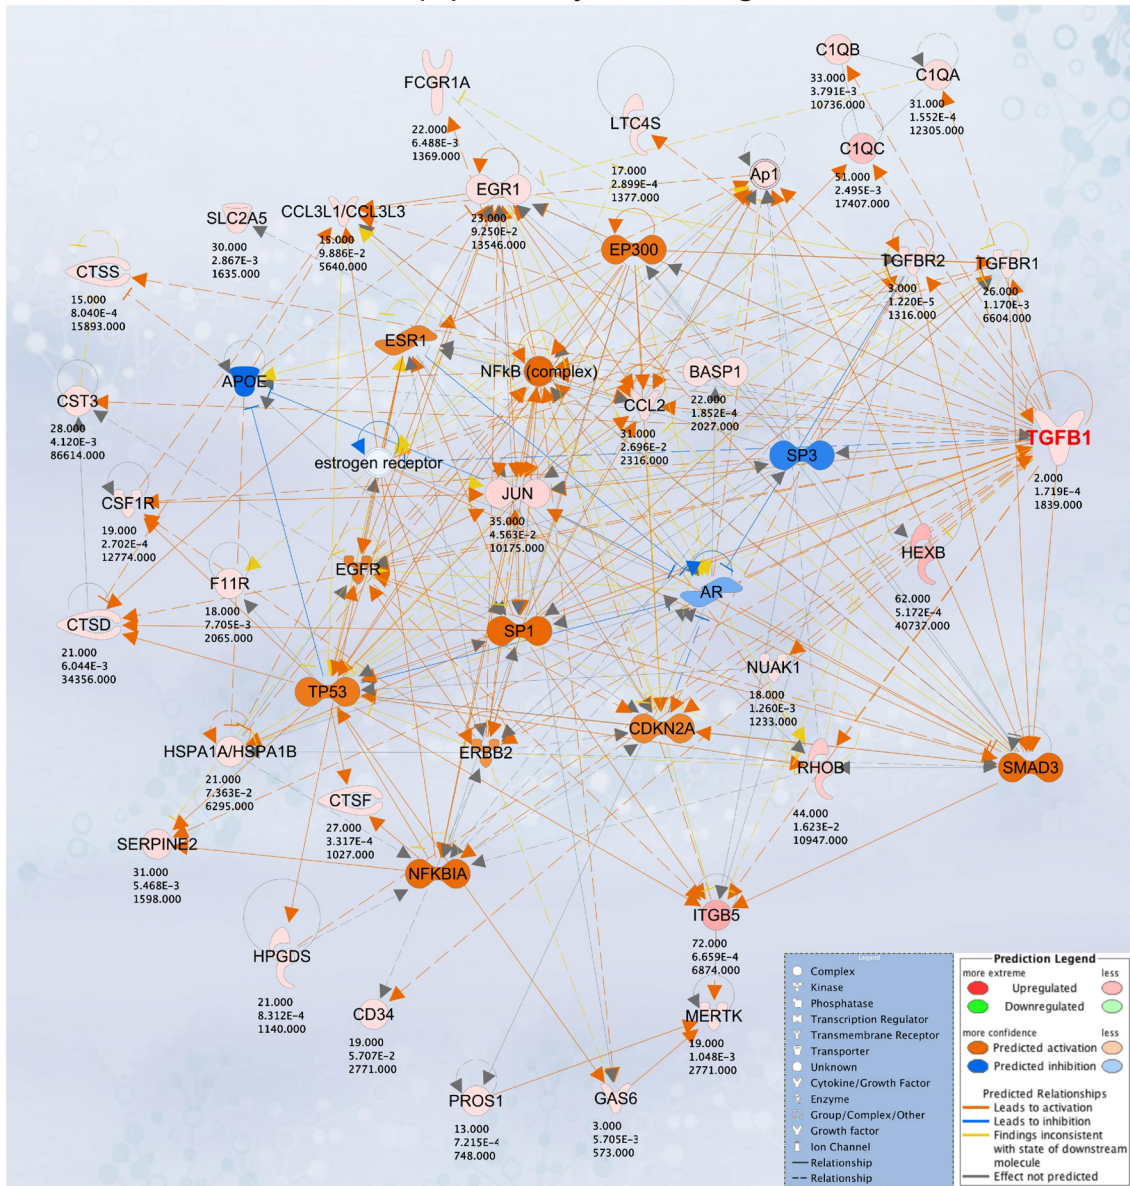

**Supplementary Figure 6. TGF-β pathway in microglia.** For each molecule in the dataset the expression fold change as compared to monocytes, P value and normalized expression level are presented.

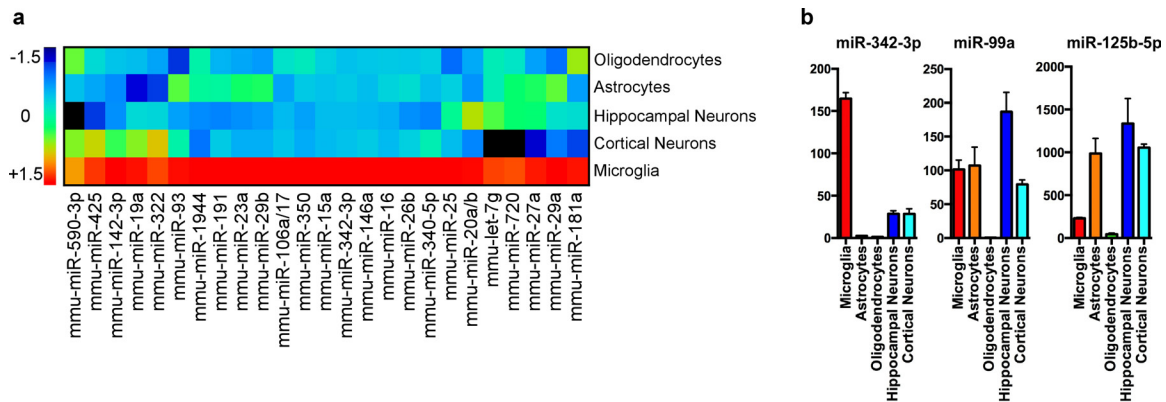

**Supplementary Figure 7. miRNA profile in microglia vs. astrocytes, oligodendrocytes and neurons.** **(a)** Heatmap of biological duplicates for FCRLS<sup>+</sup> adult microglia (n = 5 mice), Glt-EGFP<sup>+</sup> adult astrocytes (n = 9 mice), adult oligodendrocytes (n = 5 mice) and primary postnatal hippocampal and cortical neurons. Top 25 enriched miRNAs in microglia are presented (full miRNA list, [Source data – Supplementary Figure 7](#)). Each lane represents the average expression value of two biological duplicates per cell type. **(b)** qPCR analysis of microglia enriched miRNAs (miR-342-3p, miR-99a and miR-125b-5p) in CNS cell type. miRNA expression level was normalized against U6 miRNA using  $\Delta C_t$ . Bars show mean  $\pm$ SEM. Shown is one of two individual experiments.



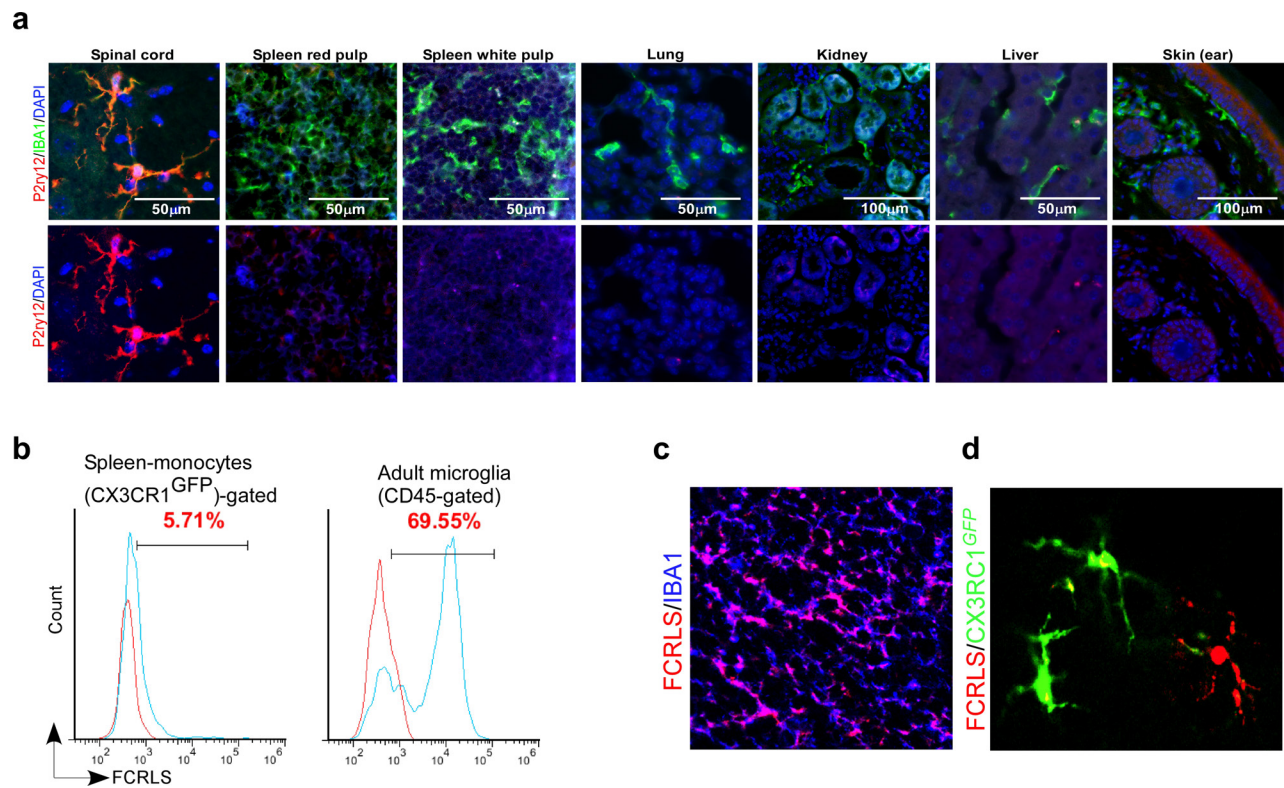

**Supplementary Figure 8. Specificity of P2ry12 and FCRLS antibodies in resident microglia. (a)** Immunohistochemical analysis of mouse spinal cord, spleen red and pulp, lung, kidney, liver and skin (ear) stained with anti-P2ry12 (microglia; red), anti-Iba-1 (myeloid cells; green) and DAPI (nucleus; blue). Representative images of 5 mice. **(b)** FACS analysis of FCRLS surface expression in splenic  $CX3CR1^{GFP/+}$  monocytes and  $CD11b/CD45^+$  brain microglia. **(c and d)** Confocal images of mouse brain stained with Iba-1 and polyclonal FCRLS antibody in **(c)** naïve and **(d)** chimeric  $CX3CR1^{GFP/+}$  mice. Anti-FCRLS signal co-localized with  $Iba-1^+$  microglia and does not stain recruited monocytes in the brain of  $CX3CR1^{GFP}$  chimeric mouse transplanted with bone marrow derived cells from  $CX3CR1^{GFP/+}$  transgenic mice.

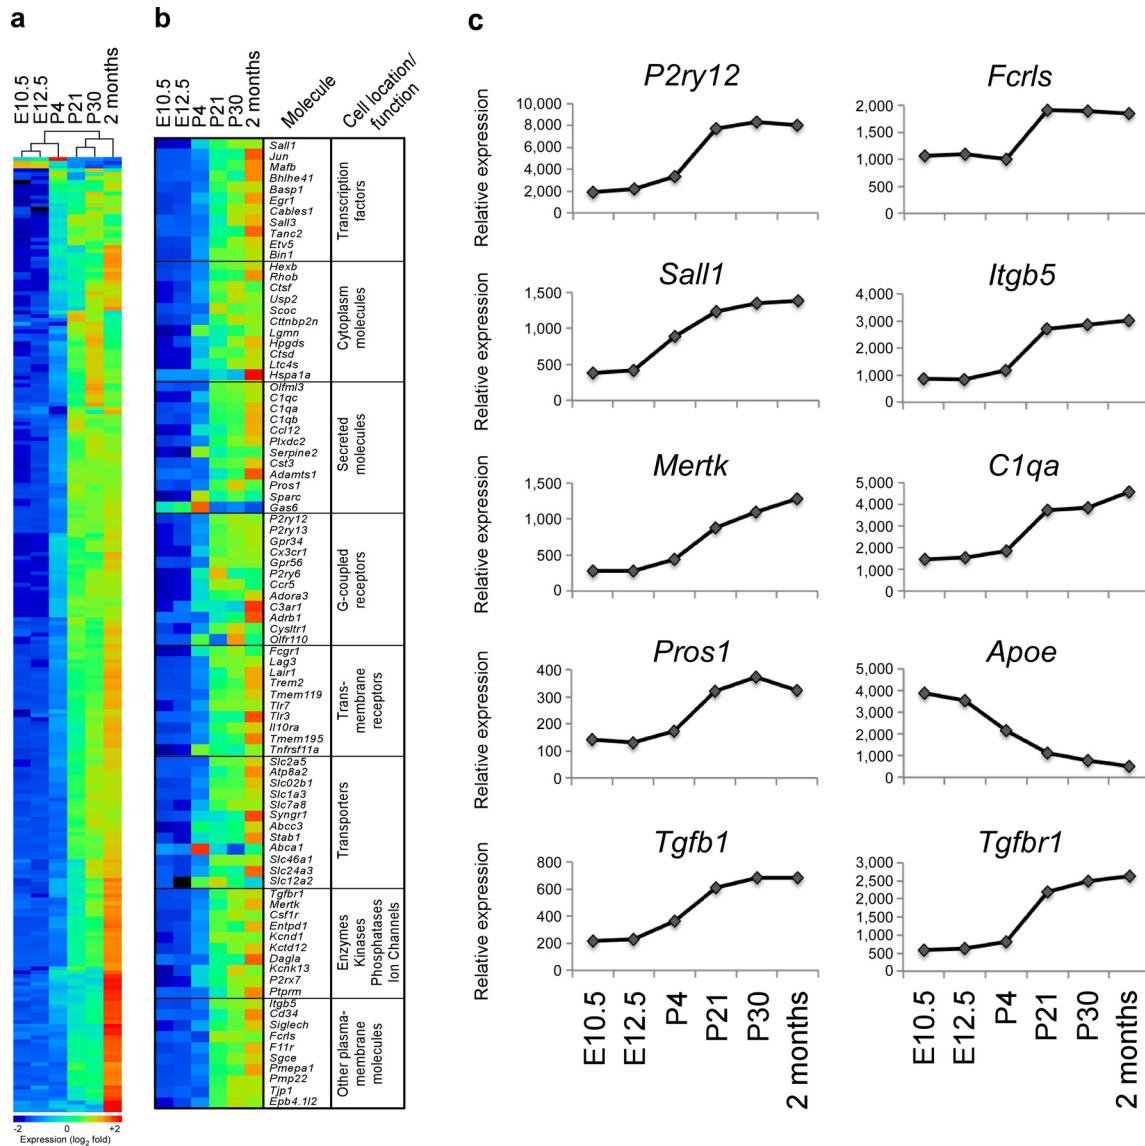

**Supplementary Figure 9.** Microglia signature during development. **(a)** MG400 expression profile of microglia from mice brain at E10.5, E12.5, P3, P21, P30 and 2 months of age (full gene list, [Source data – Supplementary Figure 9](#)). Results were log-transformed, normalized (to the mean expression of zero across samples) and centered, and populations and genes were clustered by pairwise centroid linkage with the Pearson correlation. Data are pooled of 2 different experiments; E10.5 ( $n = 10$ ), E12.5 ( $n = 10$ ), P4 ( $n = 8$ ), P21 ( $n = 5$ ), P30 ( $n = 5$ ) and 2 months ( $n = 5$ ). **(b)** Top microglial molecules grouped according to cell localization and function. **(c)** qPCR analysis of 6 selected microglia genes in MCSF+TGF- $\beta$ 1 cultured microglia. Gene expression level was normalized against *Gapdh* using  $\Delta$ Ct.

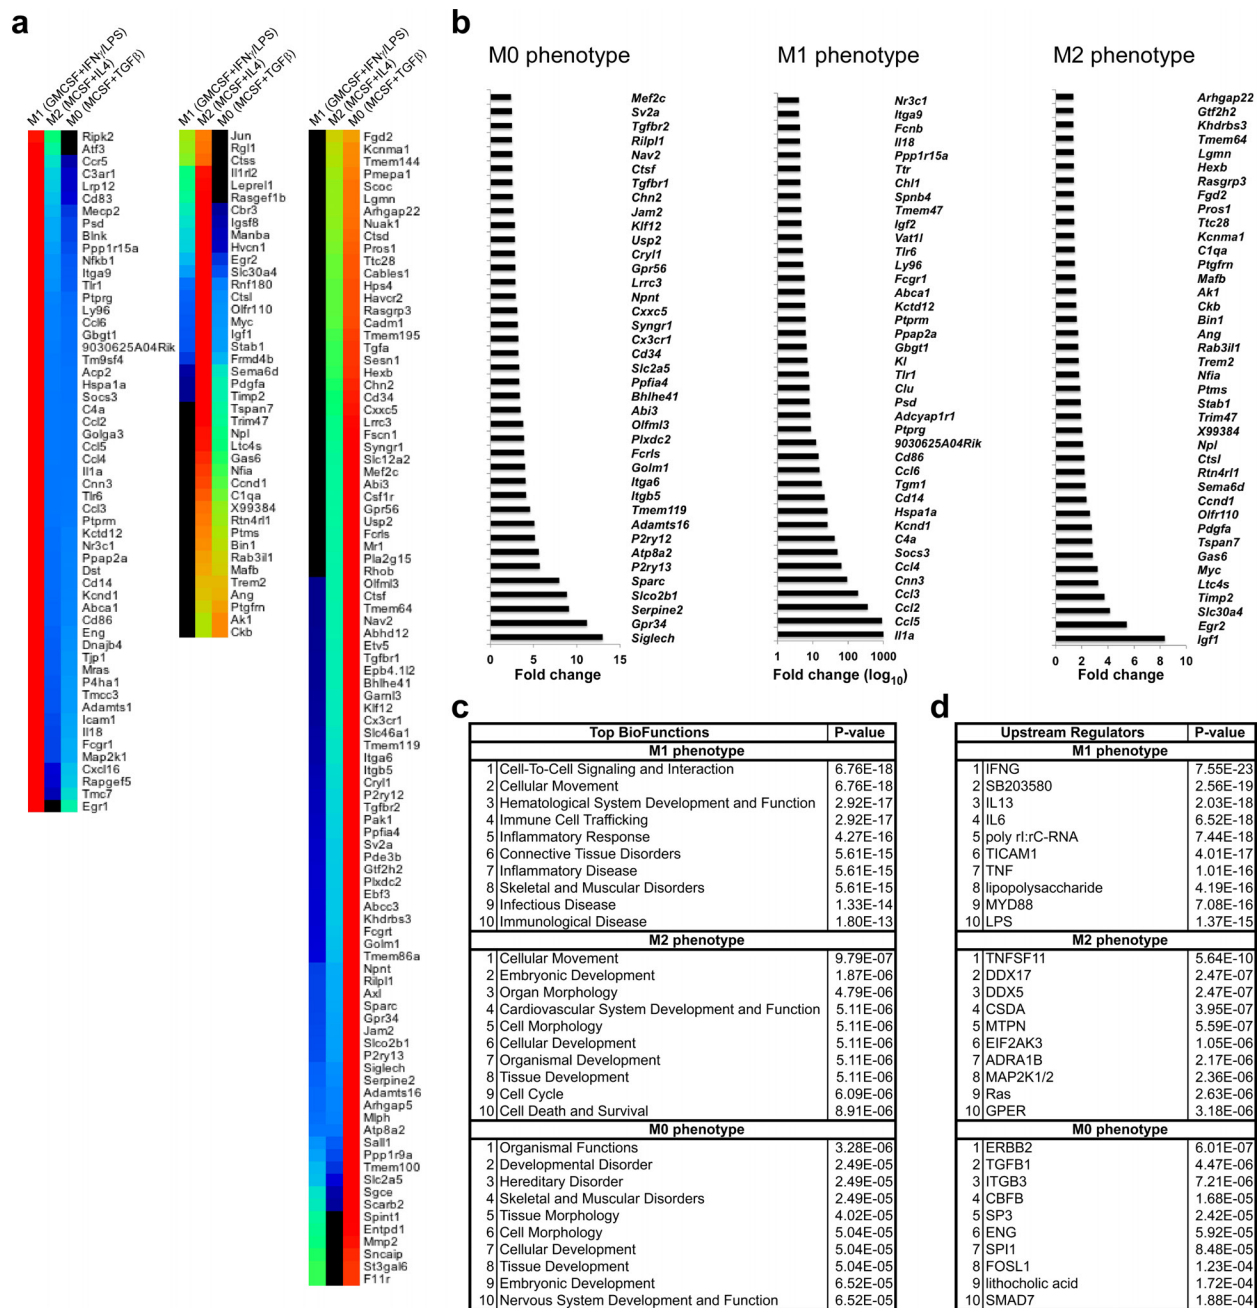

**Supplementary Figure 10. M0, M1 and M2 microglial phenotypes as measured by MG400 chip. (a)** Heatmap of significantly affected MG400 genes in M0, M1 and M2 polarized microglia. One representative of three individual experiments is shown. **(b)** Top 40 affected genes in M0, M1 and M2 microglia. Bars represent fold change as compared to the other two phenotypes. **(c and d)** IPA™ analysis of **(c)** top bio functions and **(d)** Top upstream regulators in M0-, M1- and M2-polarized microglia.

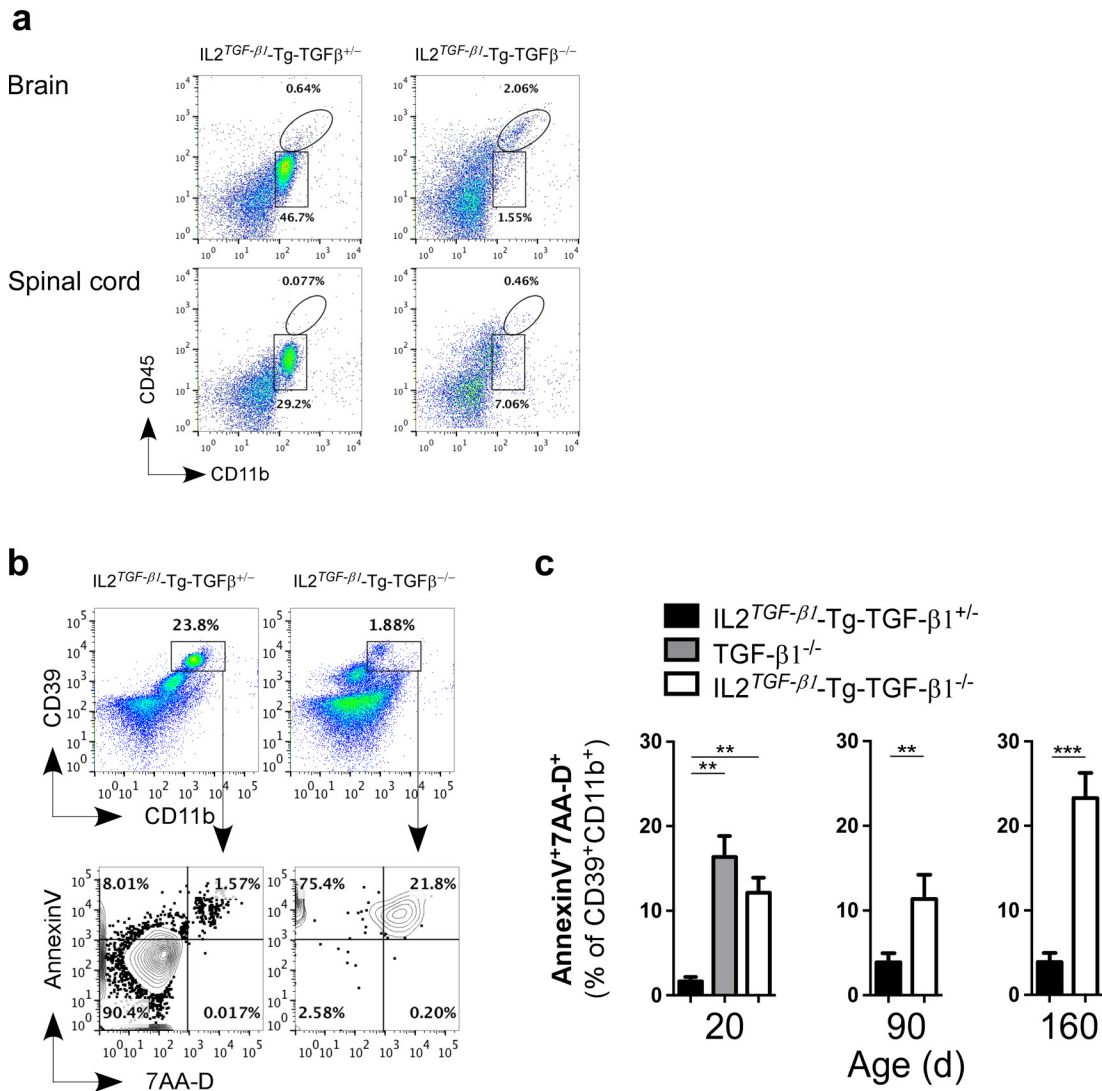

**Supplementary Figure 11. Microglia loss in CNS-TGFβ1<sup>-/-</sup> mice.** (a) Representative FACS analysis of isolated brain- and spinal cord-derived mononuclear cells stained with CD45 and CD11b antibodies at 160d of age in IL2<sup>TGFβ1</sup>-Tg-TGF-β1<sup>+/-</sup> (n = 6) and IL2<sup>TGFβ1</sup>-Tg-TGF-β1<sup>-/-</sup> (n = 6) mice. (b and c) Increased apoptosis of CD39<sup>+</sup>CD11b<sup>+</sup> cells in the brain of CNS-TGF β 1<sup>-/-</sup> mice. (b) Representative FACS analysis of isolated brain-derived mononuclear cells for apoptosis as measured by AnnexinV and 7AA-D in CD39<sup>+</sup>CD11b<sup>+</sup>-gated cells at 160d of age in IL2<sup>TGFβ1</sup>-Tg-TGF-β1<sup>+/-</sup> (left) and IL2<sup>TGFβ1</sup>-Tg-TGF-β1<sup>-/-</sup> (right) mice. (c) Quantitative analysis of AnnexinV<sup>+</sup>7AAD<sup>+</sup> cell as percentage of CD39<sup>+</sup>CD11b<sup>+</sup> cells in TGF-β1<sup>-/-</sup>, IL2<sup>TGF-β1</sup>-Tg-TGF-β1<sup>+/-</sup> and IL2<sup>TGF-β1</sup>-Tg-TGF-β1<sup>-/-</sup> mice at 20 (n = 6), 90 (n = 5) and 160 (n = 5) days. Data represent mean ± s.e.m. \*\*P<0.01, F<sub>2,6</sub>=2.146 1-Way ANOVA followed by Dunnett's multiple-comparison *post-hoc* test for comparison at 20d and \*\*P<0.01, t=4.51 and \*\*\*P<0.001, t=13.84; Student's *t* test, 2-tailed for comparison at 90d and 160d.



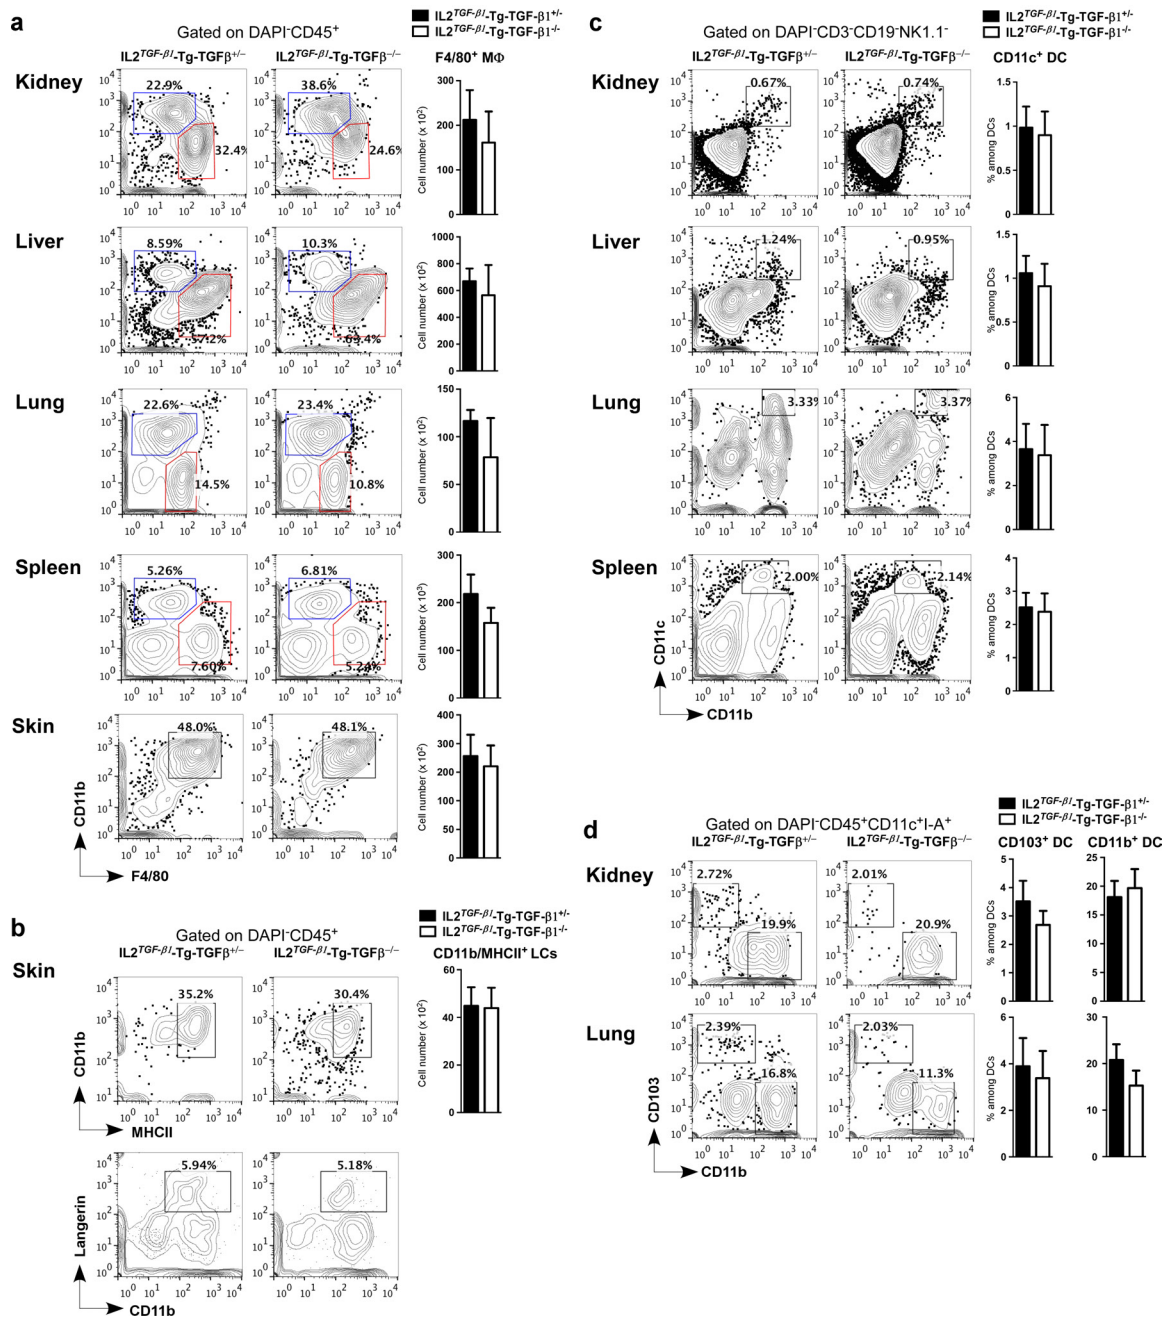

**Supplementary Figure 12. Macrophages, dendritic cells and Langerhans cells are not affected in peripheral organs of CNS-TGFβ1<sup>-/-</sup> mice.** (a-d) Nonlymphoid and lymphoid tissue myeloid cells isolated from IL2<sup>TGFβ1</sup>-Tg-TGF-β1<sup>+/-</sup> (left) and IL2<sup>TGFβ1</sup>-Tg-TGF-β1<sup>-/-</sup> (right) mice at 160d were analyzed by flow cytometry. FACS representative dot plots show the percentage and absolute numbers of (a) kidney, liver, lung, spleen and skin derived CD11b<sup>+</sup>F4/80<sup>+</sup> macrophages and (b) Langerhans cell (LC) stained with MHCII<sup>+</sup>CD11b<sup>+</sup> and Langerin<sup>+</sup>CD11b<sup>+</sup> in the ear skin cell suspension among DAPI<sup>-</sup>CD45<sup>+</sup> cells of IL2<sup>TGFβ1</sup>-Tg-TGF-β1<sup>+/-</sup> (n = 6) and IL2<sup>TGFβ1</sup>-Tg-TGF-β1<sup>-/-</sup> (n = 6) mice. (c) Plots show percentage of CD11c<sup>+</sup> DCs among gated DAPI<sup>-</sup>CD3<sup>-</sup>CD19<sup>-</sup>NK1.1<sup>+</sup> cells. (d) Dot plots show percentage of CD103<sup>+</sup> and CD11b<sup>+</sup> DCs among gated DAPI<sup>-</sup>CD45<sup>+</sup>CD11c<sup>+</sup>I-A<sup>+</sup> cells. Bars represent data from 2 pooled experiments. Errors bars represent ± s.e.m.

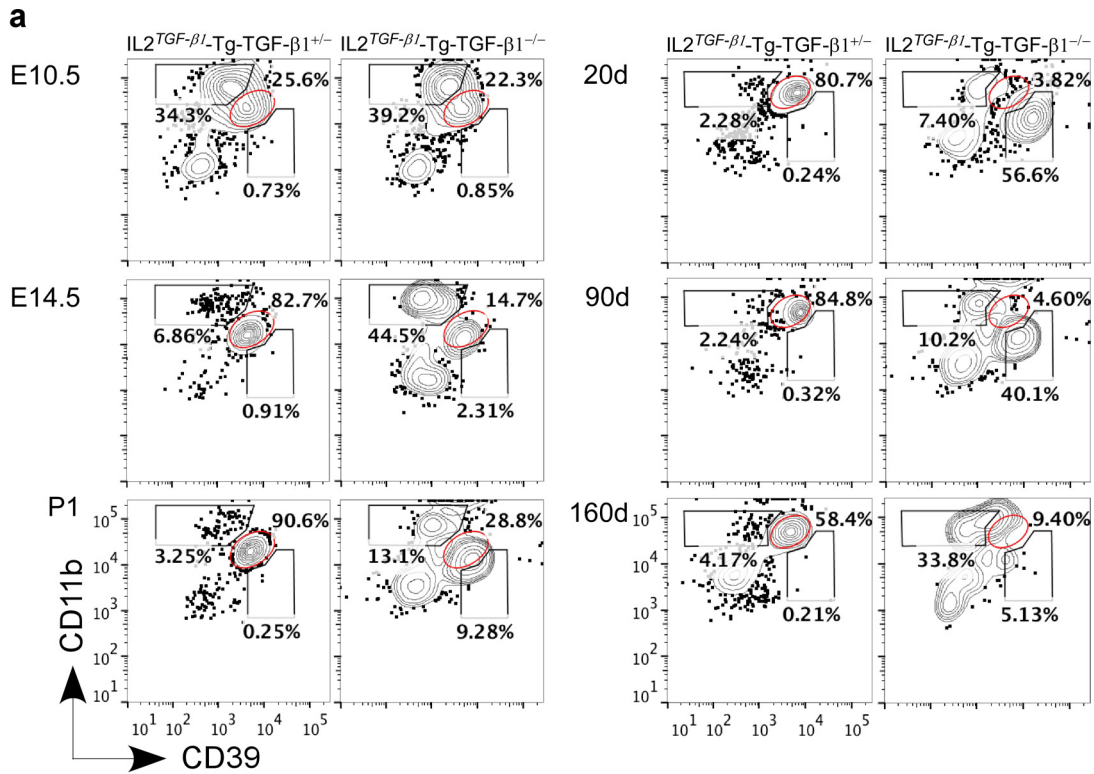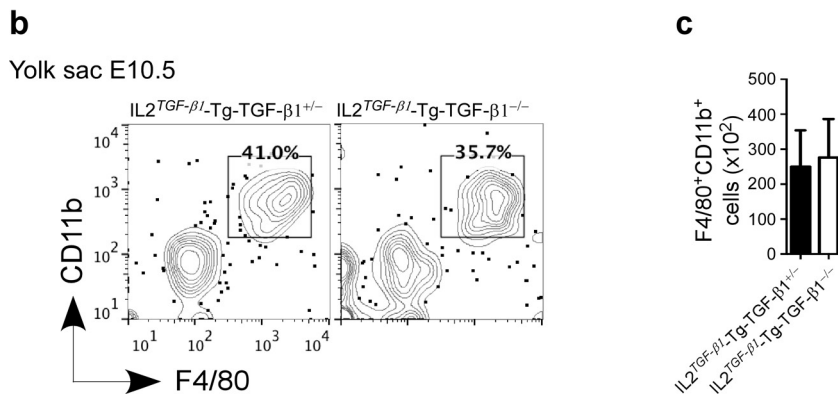

**Supplementary Figure 13. Loss of microglia during development in CNS-TGF-β1 deficient mice. (a)** FACS analysis of CD39 and CD11b expression among CD45<sup>+</sup> cells in the brain during development and aging in IL2<sup>TGF-β1</sup>-Tg-TGF-β1<sup>+/-</sup> and IL2<sup>TGF-β1</sup>-Tg-TGF-β1<sup>-/-</sup> mice at E10.5 (n = 4), E14.5 (n = 5), P1 (n = 5), 20d (n = 6), 90d (n = 5), 160d (n = 5). **(b)** FACS plots show the percentage among CD45<sup>+</sup> cells and **(c)** total cell number ± s.e.m. of F4/80<sup>+</sup>CD11b<sup>+</sup> primitive macrophages in the yolk sac at E10.5 in IL2<sup>TGF-β1</sup>-Tg-TGF-β1<sup>+/-</sup> (n = 6) and IL2<sup>TGF-β1</sup>-Tg-TGF-β1<sup>-/-</sup> (n = 10) mice. *P* = 0.74, *t* = 0.35 Student's *t* test, 2-tailed.

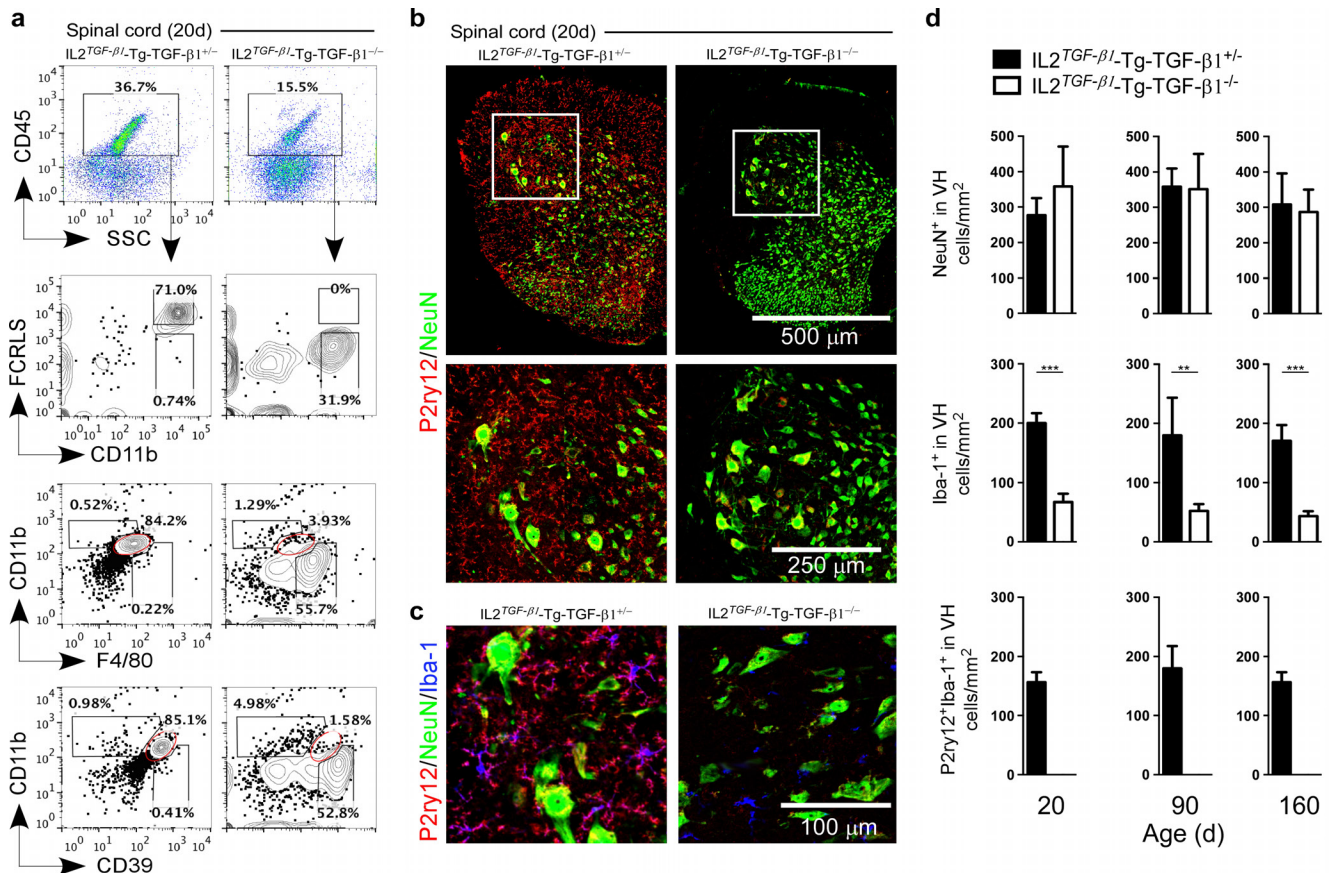

**Supplementary Figure 14. Microglia loss in the spinal cord of CNS-TGFβ1<sup>-/-</sup> mice.** (a) Representative FACS analysis of isolated spinal cord-derived mononuclear cells stained for FCRLS, F4/80, CD39 and CD11b among hematopoietic (CD45<sup>+</sup>) cells at 20d of age in IL2<sup>TGF-β1</sup>-Tg-TGF-β1<sup>+/-</sup> and IL2<sup>TGF-β1</sup>-Tg-TGF-β1<sup>-/-</sup> mice. Immunohistochemical analysis of mouse spinal cord axial section of lumbar level stained with (b) anti-P2ry12 (microglia) and anti-NeuN (neurons) and (c) anti-P2ry12 (microglia), Iba-1 (myeloid cells) and anti-NeuN (neurons) at 20 days of age (IL2<sup>TGF-β1</sup>-Tg-TGF-β1<sup>+/-</sup> and IL2<sup>TGF-β1</sup>-Tg-TGF-β1<sup>-/-</sup>) mice. Representative images of 3-5 mice. Scale bar represents 500μm (top panel) and 250μm (zoomed are indicated, bottom panel). (d) Quantitative analysis of NeuN<sup>+</sup>, Iba-1<sup>+</sup> and P2ry12<sup>+</sup>/Iba-1<sup>+</sup> cells in IL2<sup>TGF-β1</sup>-Tg-TGF-β1<sup>+/-</sup> and IL2<sup>TGF-β1</sup>-Tg-TGF-β1<sup>-/-</sup> mice at 20, 90 and 160 days of age. Data represent mean ± s.e.m (n = 5). \*\*P<0.01, \*\*\*P<0.001, Student's *t* test, 2-tailed.



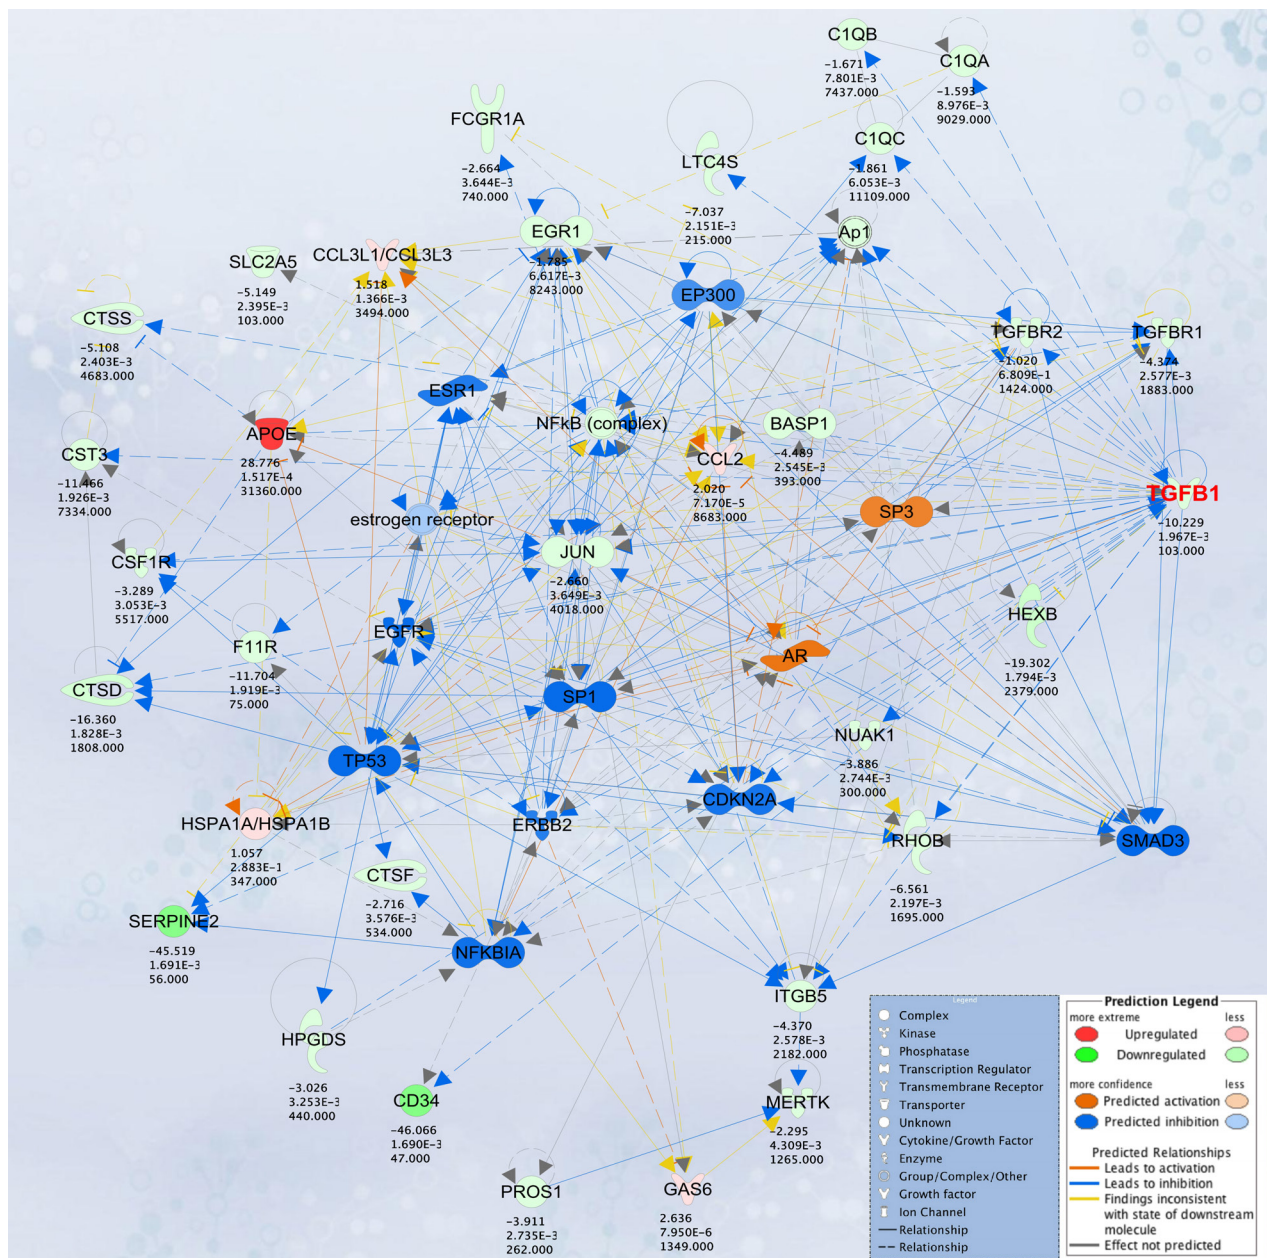

**Supplementary Figure 15. TGF- $\beta$  pathway and downstream microglial molecules are suppressed in CNS-TGF $\beta$ 1<sup>-/-</sup> mice.** For each molecule in the dataset the expression fold change as compared to microglia from IL2<sup>TGF- $\beta$ 1</sup>-Tg-TGF- $\beta$ 1<sup>+/-</sup> mice, P value and normalized expression level are presented.



**Supplementary Table 1:**  
**Top 25 enriched genes in each cell type based on hierarchical clustering**

| GeneName         | Microglia | Astrocytes | Oligodendrocytes | Cort.Neurons | Hipp.Neurons |
|------------------|-----------|------------|------------------|--------------|--------------|
| <i>Enpp2</i>     | 17        | 307        | 13613            | 34           | 24           |
| <i>Ptgds</i>     | 10        | 52         | 4343             | 14           | 5            |
| <i>Aplp1</i>     | 15        | 976        | 11980            | 775          | 1130         |
| <i>Ncam1</i>     | 4         | 881        | 1521             | 334          | 354          |
| <i>Ttr</i>       | 10        | 98         | 1470             | 17           | 11           |
| <i>Omg</i>       | 7         | 619        | 1366             | 157          | 76           |
| <i>Gpm6b</i>     | 22        | 4040       | 4657             | 1000         | 1643         |
| <i>Qdpr</i>      | 79        | 136        | 5210             | 136          | 213          |
| <i>Slc12a2</i>   | 68        | 38         | 1295             | 36           | 20           |
| <i>Kcnk13</i>    | 81        | 7          | 320              | 27           | 11           |
| <i>Tmeff1</i>    | 11        | 19         | 457              | 126          | 109          |
| <i>Chn2</i>      | 92        | 9          | 401              | 36           | 40           |
| <i>App</i>       | 130       | 440        | 5319             | 564          | 785          |
| <i>Dip2a</i>     | 14        | 53         | 411              | 29           | 29           |
| <i>Tppp</i>      | 82        | 86         | 1641             | 116          | 194          |
| <i>Gab1</i>      | 139       | 159        | 1160             | 46           | 60           |
| <i>Kl</i>        | 16        | 20         | 200              | 23           | 7            |
| <i>Slc4a2</i>    | 42        | 47         | 384              | 26           | 15           |
| <i>Sv2a</i>      | 27        | 88         | 1025             | 251          | 252          |
| <i>Tmcc3</i>     | 83        | 63         | 450              | 25           | 26           |
| <i>Frm4b</i>     | 199       | 30         | 222              | 13           | 11           |
| <i>Gas7</i>      | 9         | 146        | 350              | 240          | 201          |
| <i>Bin1</i>      | 407       | 35         | 715              | 69           | 71           |
| <i>Sema6d</i>    | 11        | 167        | 190              | 18           | 14           |
| <i>Tmem144</i>   | 75        | 60         | 209              | 20           | 9            |
| <i>Ptprz1</i>    | 2         | 2144       | 104              | 397          | 546          |
| <i>Clu</i>       | 8         | 7418       | 842              | 419          | 639          |
| <i>Gpr37l1</i>   | 12        | 3047       | 131              | 26           | 5            |
| <i>Gpm6a</i>     | 10        | 3263       | 130              | 1305         | 1654         |
| <i>Slc6a1</i>    | 6         | 1373       | 193              | 156          | 96           |
| <i>Tmem47</i>    | 6         | 861        | 93               | 147          | 156          |
| <i>Slc1a3</i>    | 257       | 16656      | 425              | 670          | 1266         |
| <i>Abcb4</i>     | 5         | 643        | 295              | 276          | 323          |
| <i>Nrcam</i>     | 6         | 319        | 19               | 146          | 268          |
| <i>Apoe</i>      | 368       | 11630      | 2882             | 851          | 1672         |
| <i>Il18</i>      | 55        | 404        | 79               | 18           | 21           |
| <i>Tspan7</i>    | 65        | 1428       | 120              | 184          | 280          |
| <i>Chi3l1</i>    | 8         | 102        | 16               | 15           | 6            |
| <i>Axl</i>       | 11        | 131        | 13               | 17           | 14           |
| <i>Cables1</i>   | 102       | 142        | 9                | 21           | 15           |
| <i>Ahcy1</i>     | 64        | 1017       | 324              | 152          | 190          |
| <i>C4a</i>       | 9         | 120        | 51               | 16           | 33           |
| <i>Adcyap1r1</i> | 9         | 110        | 16               | 40           | 28           |
| <i>Tlr3</i>      | 66        | 118        | 28               | 17           | 9            |
| <i>Fcgrt</i>     | 139       | 172        | 54               | 22           | 14           |
| <i>Phyh1</i>     | 132       | 602        | 105              | 90           | 118          |
| <i>Ckb</i>       | 357       | 4334       | 2061             | 1070         | 1179         |
| <i>Cpne2</i>     | 14        | 129        | 21               | 37           | 44           |
| <i>Tmem100</i>   | 56        | 77         | 13               | 12           | 12           |
| <i>Etv5</i>      | 183       | 437        | 40               | 131          | 137          |
| <i>Nefl</i>      | 8         | 29         | 5                | 84           | 294          |
| <i>Rtn1</i>      | 39        | 313        | 19               | 782          | 1126         |
| <i>Chl1</i>      | 4         | 163        | 14               | 179          | 270          |
| <i>Basp1</i>     | 535       | 238        | 29               | 1246         | 1629         |
| <i>D3Bwg056</i>  | 10        | 115        | 82               | 293          | 435          |
| <i>Kcnma1</i>    | 8         | 62         | 6                | 105          | 158          |
| <i>Unc13a</i>    | 14        | 76         | 7                | 174          | 203          |
| <i>Gm4392</i>    | 4         | 91         | 11               | 116          | 135          |
| <i>Slc2a3</i>    | 14        | 24         | 4                | 66           | 78           |
| <i>Sez6l</i>     | 11        | 34         | 9                | 44           | 110          |
| <i>Cnrip1</i>    | 28        | 89         | 21               | 153          | 267          |
| <i>Cnd1</i>      | 90        | 9          | 13               | 158          | 129          |
| <i>Khdrbs3</i>   | 64        | 128        | 30               | 128          | 325          |
| <i>Ctnna2</i>    | 14        | 39         | 93               | 197          | 181          |
| <i>Rab6b</i>     | 40        | 93         | 52               | 224          | 253          |
| <i>Bend6</i>     | 27        | 20         | 12               | 91           | 78           |
| <i>Necap1</i>    | 49        | 97         | 38               | 150          | 202          |
| <i>Rufy3</i>     | 33        | 89         | 168              | 183          | 234          |
| <i>Pgrmc1</i>    | 73        | 239        | 192              | 319          | 456          |
| <i>Ptms</i>      | 136       | 206        | 83               | 338          | 430          |
| <i>Gmfb</i>      | 76        | 152        | 186              | 294          | 398          |
| <i>Myef2</i>     | 54        | 121        | 96               | 220          | 248          |
| <i>Pea15a</i>    | 111       | 482        | 688              | 842          | 740          |
| <i>Gnas</i>      | 90        | 223        | 186              | 392          | 419          |
| <i>Hmgp1</i>     | 103       | 196        | 93               | 276          | 321          |
| <i>P2ry12</i>    | 4666      | 25         | 92               | 9            | 4            |
| <i>Tmem119</i>   | 2099      | 4          | 53               | 12           | 6            |
| <i>Fcrls</i>     | 965       | 5          | 34               | 13           | 4            |
| <i>Olfml3</i>    | 905       | 3          | 18               | 14           | 5            |
| <i>Hexb</i>      | 8911      | 103        | 235              | 22           | 27           |
| <i>Ctss</i>      | 4101      | 9          | 76               | 15           | 3            |
| <i>Clqb</i>      | 3150      | 3          | 62               | 3            | 4            |
| <i>Clqa</i>      | 2669      | 5          | 60               | 7            | 3            |
| <i>Csf1r</i>     | 2905      | 4          | 80               | 24           | 7            |
| <i>P2ry13</i>    | 1472      | 2          | 32               | 8            | 7            |
| <i>Ox3cr1</i>    | 3836      | 6          | 79               | 21           | 7            |
| <i>Gpr34</i>     | 838       | 1          | 16               | 13           | 1            |
| <i>Clqc</i>      | 4558      | 8          | 109              | 15           | 8            |
| <i>Mafb</i>      | 1382      | 5          | 14               | 18           | 11           |
| <i>Tgfbrr1</i>   | 1678      | 27         | 75               | 22           | 25           |
| <i>Fcgr1</i>     | 456       | 2          | 14               | 9            | 4            |
| <i>Entpd1</i>    | 731       | 21         | 39               | 9            | 4            |
| <i>Ltc4s</i>     | 461       | 4          | 28               | 5            | 3            |
| <i>Csf3r</i>     | 294       | 2          | 5                | 12           | 6            |
| <i>Il10ra</i>    | 604       | 3          | 15               | 25           | 5            |
| <i>Egr1</i>      | 1968      | 163        | 12               | 63           | 58           |
| <i>Siglech</i>   | 489       | 3          | 17               | 20           | 6            |
| <i>Ccl2</i>      | 126       | 1          | 5                | 18           | 6            |
| <i>Lag3</i>      | 246       | 8          | 11               | 8            | 2            |
| <i>Fos</i>       | 1806      | 47         | 13               | 39           | 13           |

**Supplementary Table 2:**  
**Top unique microglial genes and shared genes between microglia, neurons, astrocytes and oligodendrocytes.**

| Top 40 Microglial unique genes | Microglia/Neuron genes | Microglia/Astrocyte genes | Microglia/Oligodendrocyte genes |
|--------------------------------|------------------------|---------------------------|---------------------------------|
| <i>P2ry12</i>                  | <i>Asph</i>            | <i>Sall1</i>              | <i>C1qc</i>                     |
| <i>Tmem119</i>                 | <i>Basp1</i>           | <i>Irgb5</i>              | <i>C1qb</i>                     |
| <i>Olfml3</i>                  | <i>Cd34</i>            | <i>Cst3</i>               | <i>C1qa</i>                     |
| <i>P2ry13</i>                  | <i>Tanc2</i>           | <i>Slc1a3</i>             | <i>Ctss</i>                     |
| <i>Cx3cr1</i>                  | <i>Slc7a8</i>          | <i>Gpr56</i>              | <i>Timp2</i>                    |
| <i>Gpr34</i>                   | <i>Syng1</i>           | <i>Mertk</i>              | <i>Bin1</i>                     |
| <i>Hexb</i>                    | <i>Rgmb</i>            | <i>Cables1</i>            | <i>Frm4d4b</i>                  |
| <i>Rhob</i>                    | <i>Npnt</i>            | <i>Sall3</i>              | <i>Tmcc3</i>                    |
| <i>Jun</i>                     | <i>Mef2a</i>           | <i>Etv5</i>               | <i>Chn2</i>                     |
| <i>Rab3il1</i>                 | <i>Rtn4r11</i>         | <i>Chst7</i>              | <i>Gab1</i>                     |
| <i>Serpine2</i>                | <i>Mef2c</i>           | <i>Eya4</i>               | <i>Spsb1</i>                    |
| <i>Ccl2</i>                    | <i>Khdrbs3</i>         | <i>Arhgap5</i>            | <i>Slc12a2</i>                  |
| <i>Scoc</i>                    | <i>Myo1b</i>           | <i>Rnf180</i>             | <i>Scarb2</i>                   |
| <i>Fcrls</i>                   | <i>Rtn1</i>            | <i>Pmp22</i>              | <i>Pdgfa</i>                    |
| <i>Siglech</i>                 |                        | <i>Tmem144</i>            | <i>Rap1gds1</i>                 |
| <i>Slc2a5</i>                  |                        | <i>Npl</i>                | <i>Pak1</i>                     |
| <i>Lrrc3</i>                   |                        | <i>Trim47</i>             | <i>Epn2</i>                     |
| <i>Plxdc2</i>                  |                        | <i>Tlr3</i>               |                                 |
| <i>Usp2</i>                    |                        | <i>Irga6</i>              |                                 |
| <i>Ctsf</i>                    |                        | <i>Abca1</i>              |                                 |
| <i>Cttnbp2nl</i>               |                        | <i>Tmem100</i>            |                                 |
| <i>Tgfb1</i>                   |                        | <i>Arhgap12</i>           |                                 |
| <i>Atp8a2</i>                  |                        | <i>Fads1</i>              |                                 |
| <i>Lgmn</i>                    |                        | <i>Spire1</i>             |                                 |
| <i>Slco2b1</i>                 |                        | <i>Tspan7</i>             |                                 |
| <i>Egr1</i>                    |                        | <i>Jam2</i>               |                                 |
| <i>Mafb</i>                    |                        | <i>Lrrc8a</i>             |                                 |
| <i>Bhlhe41</i>                 |                        | <i>Il18</i>               |                                 |
| <i>Fcgr1a</i>                  |                        |                           |                                 |
| <i>Ctsd</i>                    |                        |                           |                                 |
| <i>Hpgds</i>                   |                        |                           |                                 |
| <i>Hspa1a</i>                  |                        |                           |                                 |
| <i>Adams1</i>                  |                        |                           |                                 |
| <i>Lag3</i>                    |                        |                           |                                 |
| <i>Csf1r</i>                   |                        |                           |                                 |
| <i>F11r</i>                    |                        |                           |                                 |
| <i>Golm1</i>                   |                        |                           |                                 |
| <i>Nuak1</i>                   |                        |                           |                                 |
| <i>Crybb1</i>                  |                        |                           |                                 |
| <i>Ltc4s</i>                   |                        |                           |                                 |

**Supplementary Table 2.** Top unique microglial genes and shared genes between microglia and neurons, astrocytes and oligodendrocytes. The top 40 microglia specific genes are presented. Complete list of 152 microglia enriched genes are shown in [Source data – Supplementary Table 2](#).

**Supplementary Table 3:  
Top microglia interactions by protein functions**

| Object Type           | Network Object name                     | Actual | Expected | Ratio | p-value  |
|-----------------------|-----------------------------------------|--------|----------|-------|----------|
| Transcription factors | PU.1                                    | 46     | 15.36    | 2.994 | 3.67E-11 |
|                       | GCR-alpha                               | 69     | 30.73    | 2.245 | 2.00E-10 |
|                       | GATA-1                                  | 61     | 26.61    | 2.292 | 1.18E-09 |
|                       | SP1                                     | 127    | 76.84    | 1.653 | 2.10E-09 |
|                       | ETS2                                    | 28     | 7.537    | 3.715 | 2.88E-09 |
|                       | HIF1A                                   | 47     | 19.03    | 2.469 | 1.19E-08 |
|                       | CREB1                                   | 69     | 34.24    | 2.015 | 1.77E-08 |
|                       | RelA (p65 NF-kB subunit)                | 59     | 27.55    | 2.141 | 2.70E-08 |
|                       | NF-kB1 (p50)                            | 35     | 12.35    | 2.835 | 3.54E-08 |
|                       | MafB                                    | 15     | 2.572    | 5.832 | 4.33E-08 |
|                       | C/EBPbeta                               | 56     | 26.14    | 2.142 | 6.27E-08 |
|                       | ETS1                                    | 48     | 20.89    | 2.298 | 7.57E-08 |
|                       | SP3                                     | 35     | 12.79    | 2.736 | 8.49E-08 |
|                       | c-Jun                                   | 54     | 25.38    | 2.127 | 1.38E-07 |
|                       | BATF                                    | 11     | 1.454    | 7.567 | 1.88E-07 |
|                       | STAT1                                   | 37     | 15.72    | 2.353 | 1.46E-06 |
|                       | C/EBPalpha                              | 44     | 20.84    | 2.111 | 2.64E-06 |
|                       | p63                                     | 35     | 14.83    | 2.36  | 2.65E-06 |
|                       | Elk-3                                   | 7      | 0.6486   | 10.79 | 2.73E-06 |
|                       | PEA3                                    | 26     | 9.348    | 2.781 | 2.99E-06 |
| Ligands               | CCL8                                    | 7      | 0.5591   | 12.52 | 9.07E-07 |
|                       | APOA1                                   | 11     | 2.55     | 4.314 | 5.05E-05 |
|                       | TGF-beta 3                              | 6      | 0.7157   | 8.384 | 6.70E-05 |
|                       | Endostatin                              | 7      | 1.096    | 6.388 | 1.02E-04 |
|                       | TGF-beta 1                              | 12     | 3.377    | 3.553 | 1.54E-04 |
|                       | Cyr61                                   | 8      | 1.7      | 4.707 | 2.94E-04 |
|                       | VIP                                     | 5      | 0.6486   | 7.709 | 4.17E-04 |
|                       | LAMA2                                   | 3      | 0.1789   | 16.77 | 5.72E-04 |
|                       | LIF                                     | 5      | 0.6933   | 7.212 | 5.75E-04 |
|                       | SDF-1                                   | 7      | 1.543    | 4.536 | 8.73E-04 |
|                       | CCL2                                    | 8      | 2.035    | 3.931 | 9.89E-04 |
|                       | Galanin                                 | 4      | 0.4697   | 8.517 | 1.09E-03 |
|                       | MIP-1-beta                              | 5      | 0.8499   | 5.883 | 1.50E-03 |
|                       | LAMC3                                   | 4      | 0.5144   | 7.776 | 1.56E-03 |
|                       | LL37                                    | 5      | 0.9169   | 5.453 | 2.11E-03 |
|                       | CCL13                                   | 5      | 0.9169   | 5.453 | 2.11E-03 |
|                       | APOE                                    | 9      | 2.84     | 3.169 | 2.24E-03 |
|                       | Fibrillin 1                             | 7      | 1.879    | 3.726 | 2.75E-03 |
|                       | FasL(TNFSF6)                            | 9      | 2.93     | 3.072 | 2.77E-03 |
|                       | IP10                                    | 6      | 1.431    | 4.192 | 3.04E-03 |
| Receptors             | Agtr1b                                  | 5      | 0.3131   | 15.97 | 9.28E-06 |
|                       | Tissue factor                           | 8      | 1.141    | 7.014 | 1.61E-05 |
|                       | AGTR1                                   | 10     | 1.923    | 5.199 | 2.20E-05 |
|                       | ITGB4                                   | 9      | 1.566    | 5.749 | 2.51E-05 |
|                       | CXCR6                                   | 3      | 0.08946  | 33.54 | 4.37E-05 |
|                       | CD9                                     | 10     | 2.192    | 4.563 | 6.87E-05 |
|                       | BAMBI                                   | 5      | 0.492    | 10.16 | 1.05E-04 |
|                       | TREM1                                   | 4      | 0.2907   | 13.76 | 1.50E-04 |
|                       | CCR4                                    | 4      | 0.2907   | 13.76 | 1.50E-04 |
|                       | ITGB1                                   | 16     | 5.613    | 2.85  | 1.81E-04 |
|                       | Neuropilin-2                            | 6      | 0.8946   | 6.707 | 2.44E-04 |
|                       | VEGFR-2                                 | 12     | 3.578    | 3.354 | 2.64E-04 |
|                       | EGFR                                    | 28     | 13.75    | 2.036 | 3.28E-04 |
|                       | LDLR                                    | 7      | 1.364    | 5.131 | 4.11E-04 |
|                       | ITGB8                                   | 4      | 0.3802   | 10.52 | 4.66E-04 |
|                       | Endoglin                                | 6      | 1.029    | 5.832 | 5.32E-04 |
|                       | A2M receptor                            | 13     | 4.428    | 2.936 | 5.40E-04 |
|                       | PTPRO                                   | 6      | 1.051    | 5.708 | 5.98E-04 |
|                       | Plexin B1                               | 5      | 0.738    | 6.775 | 7.75E-04 |
|                       | TGF-beta receptor type III (betaglycan) | 7      | 1.521    | 4.603 | 8.00E-04 |
| Enzymes               | p300                                    | 40     | 21       | 1.905 | 7.76E-05 |
|                       | JMJD3                                   | 14     | 4.182    | 3.348 | 8.49E-05 |
|                       | MTCBP-1                                 | 3      | 0.1342   | 22.36 | 2.11E-04 |
|                       | GCL cat                                 | 7      | 1.23     | 5.691 | 2.15E-04 |
|                       | AOX1                                    | 5      | 0.5815   | 8.599 | 2.44E-04 |
|                       | PLC-gamma 2                             | 9      | 2.102    | 4.281 | 2.56E-04 |
|                       | AK1BA                                   | 4      | 0.3355   | 11.92 | 2.77E-04 |
|                       | GGT1                                    | 5      | 0.6038   | 8.28  | 2.94E-04 |
|                       | F1ase-alpha                             | 5      | 0.6262   | 7.965 | 3.52E-04 |
|                       | GNT-V                                   | 6      | 0.984    | 6.097 | 4.16E-04 |
|                       | HPGD                                    | 4      | 0.4026   | 9.936 | 5.89E-04 |
|                       | PLD2                                    | 7      | 1.476    | 4.742 | 6.67E-04 |
|                       | PSAT                                    | 4      | 0.4249   | 9.413 | 7.33E-04 |
|                       | NRHQR2                                  | 4      | 0.4249   | 9.413 | 7.33E-04 |
|                       | TPST1                                   | 3      | 0.2013   | 14.9  | 8.44E-04 |
|                       | TGM2                                    | 12     | 4.137    | 2.9   | 9.71E-04 |
|                       | GAD1                                    | 5      | 0.8051   | 6.21  | 1.17E-03 |
|                       | MAG1                                    | 3      | 0.2236   | 13.41 | 1.19E-03 |
|                       | DPYD                                    | 4      | 0.492    | 8.13  | 1.31E-03 |
|                       | SYVN1                                   | 11     | 3.713    | 2.963 | 1.31E-03 |
| Kinases               | p90RSK1                                 | 9      | 1.655    | 5.438 | 3.95E-05 |
|                       | TSSK1                                   | 3      | 0.08946  | 33.54 | 4.37E-05 |
|                       | JAK1                                    | 12     | 3.064    | 3.917 | 6.05E-05 |
|                       | c-Src                                   | 29     | 13.49    | 2.15  | 1.02E-04 |
|                       | FAK1                                    | 16     | 5.725    | 2.795 | 2.26E-04 |
|                       | p38alpha (MAPK14)                       | 17     | 6.396    | 2.658 | 2.63E-04 |
|                       | VEGFR-2                                 | 12     | 3.578    | 3.354 | 2.64E-04 |
|                       | EGFR                                    | 28     | 13.75    | 2.036 | 3.28E-04 |
|                       | DYRK1a                                  | 9      | 2.281    | 3.945 | 4.72E-04 |
|                       | p90RSK3(RPS6KA2)                        | 5      | 0.738    | 6.775 | 7.75E-04 |
|                       | TGF-beta receptor type III (betaglycan) | 7      | 1.521    | 4.603 | 8.00E-04 |
|                       | BMP receptor 2                          | 8      | 2.013    | 3.975 | 9.20E-04 |
|                       | Csk                                     | 12     | 4.249    | 2.824 | 1.22E-03 |
|                       | PI3K cat class IA (p110-alpha)          | 8      | 2.214    | 3.613 | 1.71E-03 |
|                       | TGF-beta receptor type II               | 10     | 3.355    | 2.981 | 2.06E-03 |
|                       | KCRS                                    | 3      | 0.2684   | 11.18 | 2.10E-03 |
|                       | MSK1                                    | 5      | 0.9393   | 5.323 | 2.36E-03 |
|                       | ErbB2                                   | 11     | 4.048    | 2.717 | 2.60E-03 |

**Supplementary Table 4:**  
**Top microglial upstream regulators based on genearray profile identified by IPA™**

| Upstream Regulator | Molecule Type                     | Predicted Activation State | Activation z-score | p-value of overlap |
|--------------------|-----------------------------------|----------------------------|--------------------|--------------------|
| SMAD3              | TR                                | Activated                  | 3.569              | 6.74E-09           |
| Ap1                | complex                           | Activated                  | 3.249              | 2.13E-07           |
| SP1                | TR                                | Activated                  | 3.532              | 3.56E-07           |
| EGR1               | TR                                | Activated                  | 2.479              | 4.06E-07           |
| AR                 | ligand-dependent nuclear receptor | Activated                  | 2.513              | 5.70E-06           |
| ELK1               | TR                                | Activated                  | 2.357              | 6.50E-06           |
| JUN                | TR                                | Activated                  | 2.39               | 9.42E-06           |
| NFkB (complex)     | complex                           | Activated                  | 4.64               | 1.32E-05           |
| EGR2               | TR                                | Activated                  | 2.94               | 1.76E-05           |
| NFYA               | TR                                | Activated                  | 2.121              | 2.49E-05           |
| NFKBIA             | TR                                | Activated                  | 2.824              | 2.63E-05           |
| STAT4              | TR                                | Activated                  | 3.841              | 3.99E-05           |
| NFATC2             | TR                                | Activated                  | 2.155              | 4.56E-05           |
| MITF               | TR                                | Activated                  | 2.447              | 6.82E-05           |
| ETS1               | TR                                | Activated                  | 2.918              | 8.05E-05           |
| ARNT2              | TR                                | Activated                  | 3.742              | 1.05E-04           |
| STAT3              | TR                                | Activated                  | 3.52               | 1.13E-04           |
| RELA               | TR                                | Activated                  | 2.911              | 1.20E-04           |
| SIM1               | TR                                | Activated                  | 3.742              | 1.42E-04           |
| HIF1A              | TR                                | Activated                  | 2.389              | 1.61E-04           |
| NFKB1              | TR                                | Activated                  | 2.615              | 1.65E-04           |
| CEBPB              | TR                                | Activated                  | 2.315              | 2.18E-04           |
| SMAD7              | TR                                | Inhibited                  | -2.739             | 8.92E-07           |
| KLF2               | TR                                | Inhibited                  | -2.002             | 3.87E-06           |
| IKZF1              | TR                                | Inhibited                  | -3.162             | 6.22E-05           |
| CBFB               | TR                                | Inhibited                  | -2.121             | 1.00E-04           |
| DACH1              | TR                                | Inhibited                  | -2.2               | 1.16E-04           |
| miR-29b-3p         | mature microRNA                   | Inhibited                  | -2.183             | 8.12E-03           |
| HOXA10             | TR                                | Inhibited                  | -2.333             | 1.32E-02           |
| miR-155-5p         | mature microRNA                   | Inhibited                  | -2.789             | 1.33E-02           |
| miR-16-5p          | mature microRNA                   | Inhibited                  | -2.921             | 1.42E-02           |
| miR-1              | mature microRNA                   | Inhibited                  | -2.97              | 2.31E-02           |
| MYC                | TR                                | Inhibited                  | -2.28              | 2.76E-02           |
| GFI1               | TR                                | Inhibited                  | -2.236             | 3.22E-02           |

\* TR, transcription regulator
